# Supplementary material for: A pyrene-based fluorescent and colorimetric chemodosimeter for the detection of ClO− ions
Source: Royal Society of Chemistry journal article supplement (doi:10.1039/c5ay02685g), 2015-12-02
Supplement: c5ay02685g1.pdf [file c5ay02685g1.pdf]

## **A pyrene-based fluorescent and colorimetric chemodosimeter for detection of ClO<sup>-</sup> ions**

Yang Yang <sup>a, b\*</sup>, Chao-Ying Gao <sup>a, b</sup>, Jing Chen <sup>b</sup>, Ning Zhang <sup>a</sup> and Dewen Dong <sup>a\*</sup>

<sup>a</sup> *Changchun Institute of Applied Chemistry, Chinese Academy of Sciences, Changchun, 130022,  
PR China*

<sup>b</sup> *College of Chemistry and Chemical Engineering, Inner Mongolia University for the Nationalities,  
Tongliao 028000, PR China*

*E-mail:* [yangyang-000@163.com](mailto:yangyang-000@163.com)(Y. Yang), [dwdong@ciac.jl.cn](mailto:dwdong@ciac.jl.cn) (D. Dong)

Tel: +86 475 8313570, +86 431 85693057

## 1. Materials and methods

Most of the metal salts were purchased from Tianjin Damao Chemical reagent Factory and used as received. 1-pyrenecarboxaldehyde was procured from TCI (Shanghai) Development Co. Ltd. 2,3-diaminomaleonitrile was procured from Adamas Reagent Ltd. Ethanol (AR grade) was purchased from Beijing Chemical Reagent Plant and purified before use. Water used for the experiment was double distilled.

Stock solution ( $1 \times 10^{-2}$  M) of the aqueous sodium and potassium salts of  $\text{Cl}^-$ ,  $\text{Br}^-$ ,  $\text{I}^-$ ,  $\text{ClO}^-$ ,  $\text{ClO}_3^-$ ,  $\text{BrO}_3^-$ ,  $\text{IO}_3^-$ ,  $\text{NO}_2^-$ ,  $\text{NO}_3^-$ ,  $\text{S}^{2-}$ ,  $\text{SO}_3^{2-}$ ,  $\text{SO}_4^{2-}$ ,  $\text{S}_2\text{O}_3^{2-}$ ,  $\text{CO}_3^{2-}$ ,  $\text{AcO}^-$ ,  $\text{C}_2\text{O}_4^{2-}$  and  $\text{H}_2\text{O}_2$  were prepared. Stock solution ( $1 \times 10^{-2}$  M) of the aqueous nitrate and chloride salts of  $\text{Ca}^{2+}$ ,  $\text{Mg}^{2+}$ ,  $\text{Fe}^{2+}$ ,  $\text{Fe}^{3+}$ ,  $\text{Cu}^{2+}$ ,  $\text{Zn}^{2+}$  were prepared. High concentration of the stock solutions PYCN ( $1.0 \times 10^{-4}$  M) were prepared in EtOH- $\text{H}_2\text{O}$ . The stock solutions could be diluted to desired concentrations with water when needed, and the pH values were adjusted with the aid of a pH meter.

The sensing activity was investigated by adding various anions and ROS into PYCN solution (EtOH- $\text{H}_2\text{O}$ , 8:2, v/v). The mixed solutions were shaken for 10 min before spectroscopic test in order to make the anions react with the sensors sufficiently. To investigate the kinetic behavior of the detection system, the fluorescence signal was recorded after the addition of  $\text{ClO}^-$  to the probe solution at  $\lambda_{\text{ex/em}}=355/420$  nm as a function of reaction time.

## 2. NMR and IR copies of PYCN

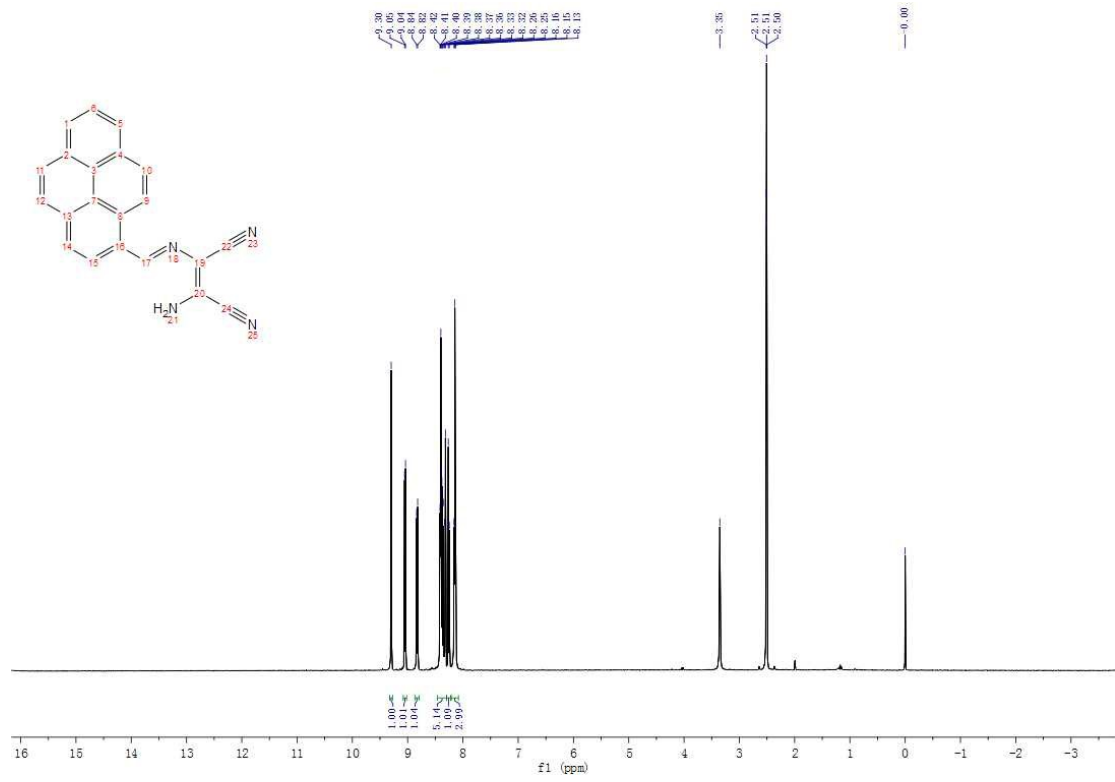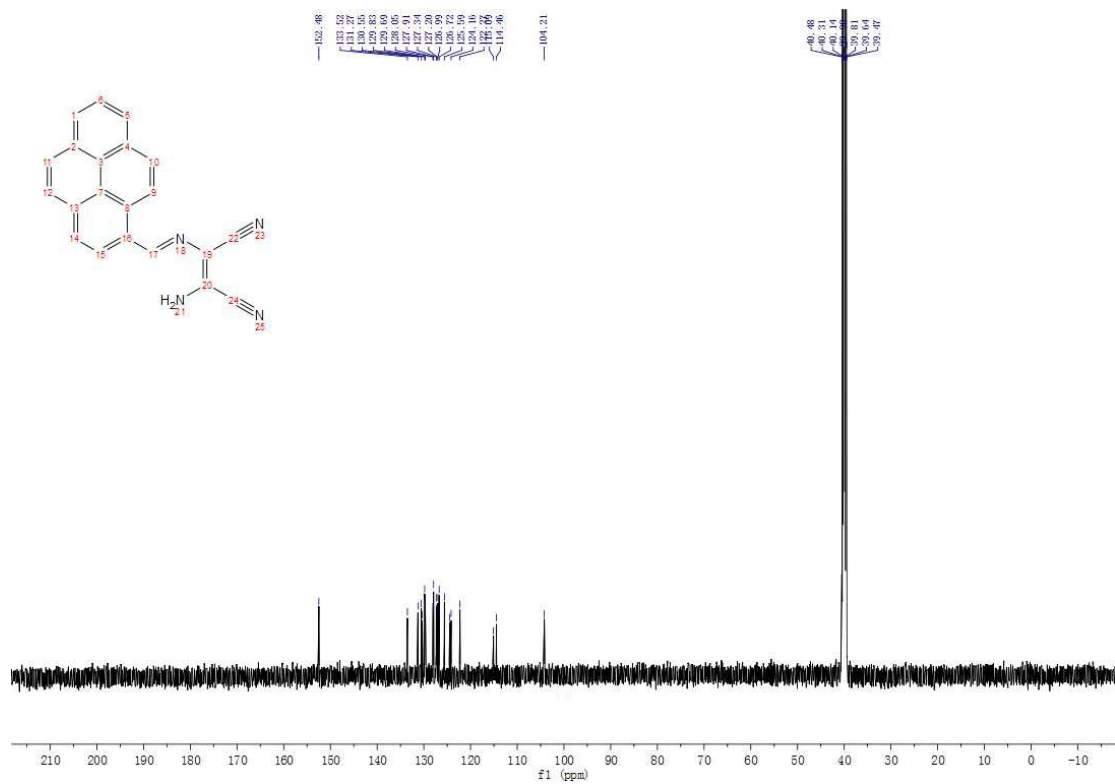

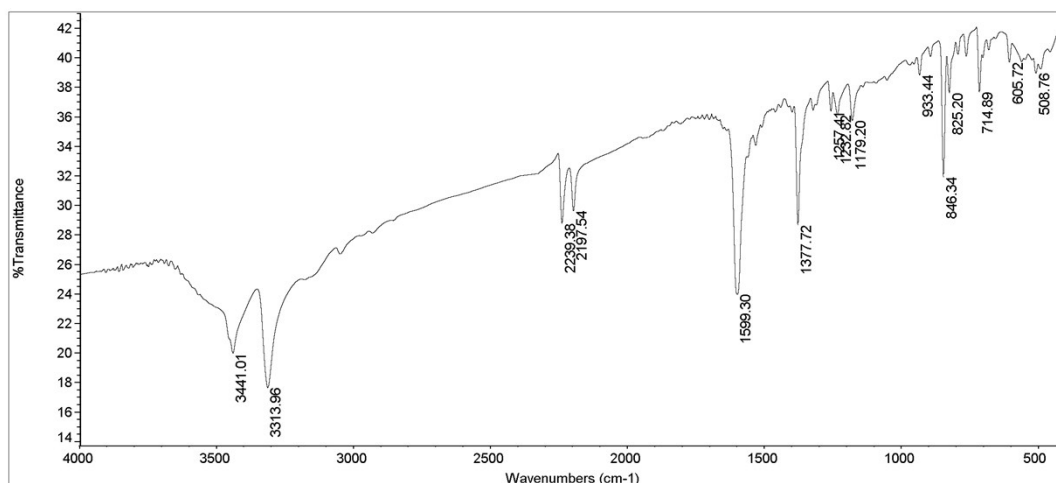

FIND PEAKS:

Region: 4000.00 400.00  
 Absolute threshold: 39.995  
 Sensitivity: 50

| Position: | Intensity: |
|-----------|------------|
| 508.76    | 38.925     |
| 605.72    | 39.651     |
| 714.89    | 37.629     |
| 825.20    | 37.575     |
| 846.34    | 31.858     |
| 933.44    | 38.799     |
| 1179.20   | 35.698     |

### 3. Photophysical responses of PYCN to $\text{ClO}^-$ .

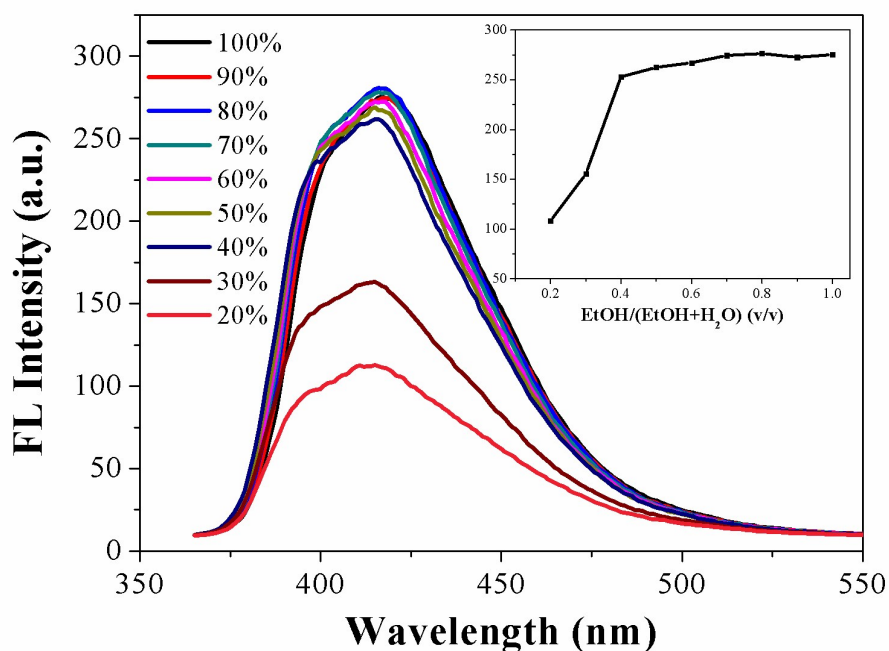

**Fig. S1.** The effect of the EtOH content on the fluorescence intensity of PYCN (10  $\mu\text{M}$ ) in the presence of  $\text{ClO}^-$  (10 Eq).

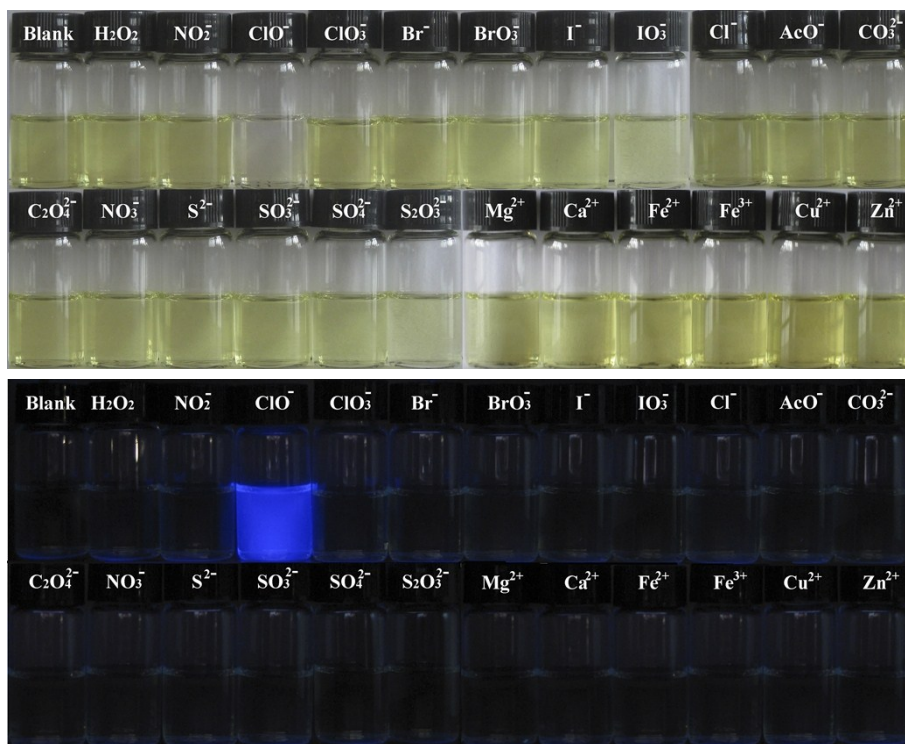

**Fig. S2.** Photograph of PYCN (10 μM) showing the color (top) and the fluorescent (bottom) changes in the presence of various ions (10 Eq).

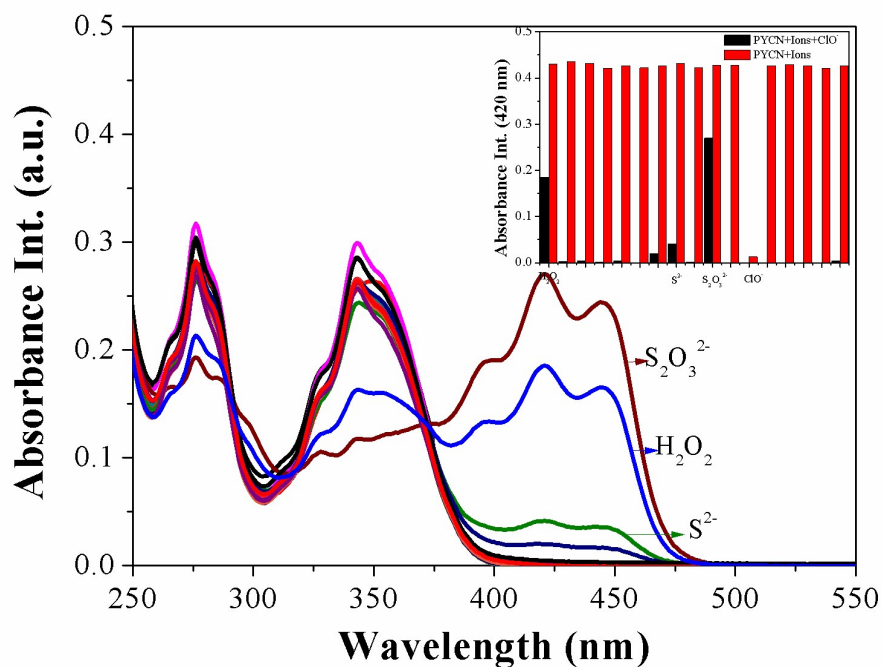

**Fig. S3.** Changes in the absorbance spectra of PYCN (10 μM) in presence of various anions and ClO<sup>-</sup> (10 Eq). The inset shows the relative absorption value at 420 nm in presence of different anions and ClO<sup>-</sup>.

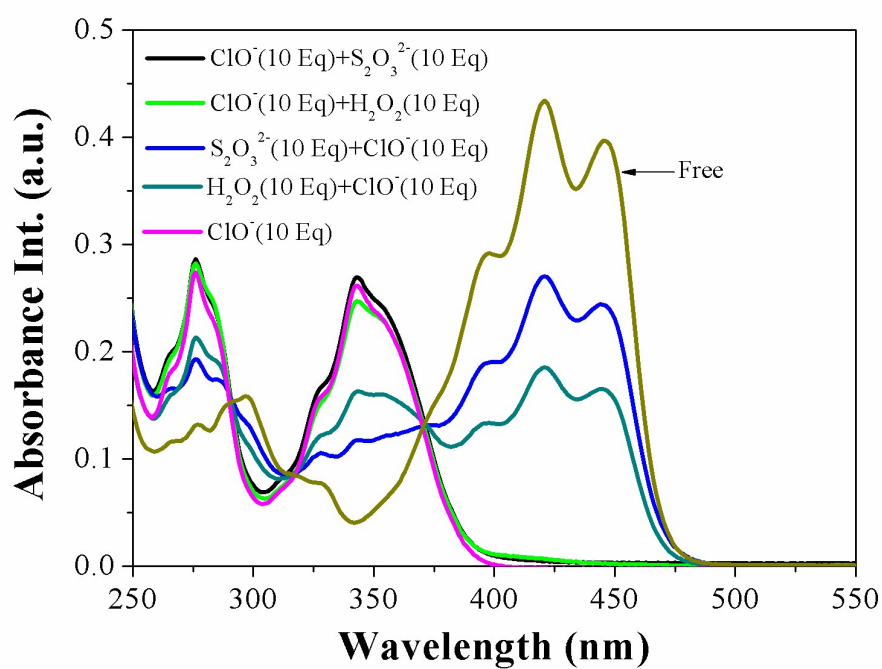

**Fig. S4.** Absorbance responses of PYCN (10 μM) by alternated adding ClO<sup>-</sup> and H<sub>2</sub>O<sub>2</sub> (S<sub>2</sub>O<sub>3</sub><sup>2-</sup>) in EtOH-H<sub>2</sub>O (4:1, v/v).

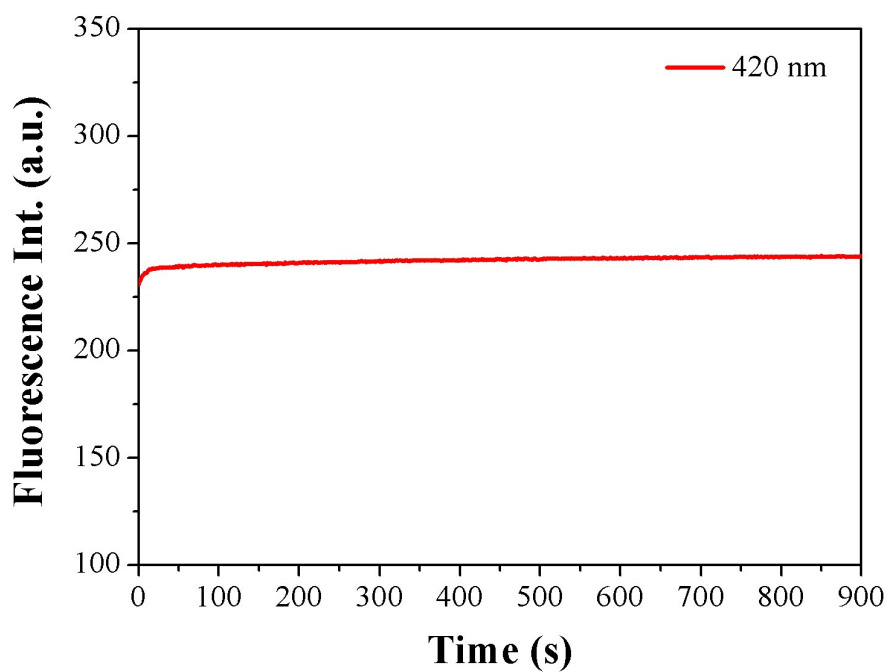

**Fig. S5.** Effects of reaction time on the fluorescence intensity of PYCN (10 μM) with 10 equiv of ClO<sup>-</sup> ions at pH 7.0.

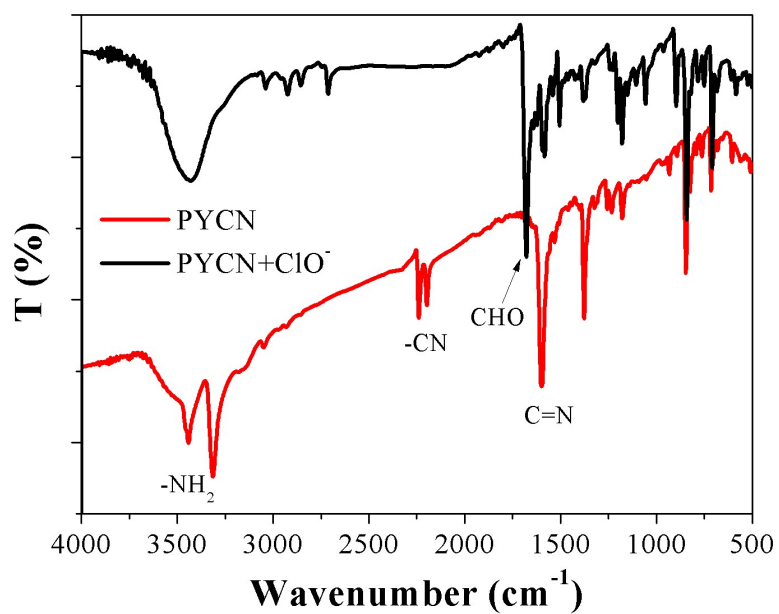

**Fig. S6.** FT-IR spectra of PYCN in the absence (a) and presence of  $\text{ClO}^-$  (10 equiv.)

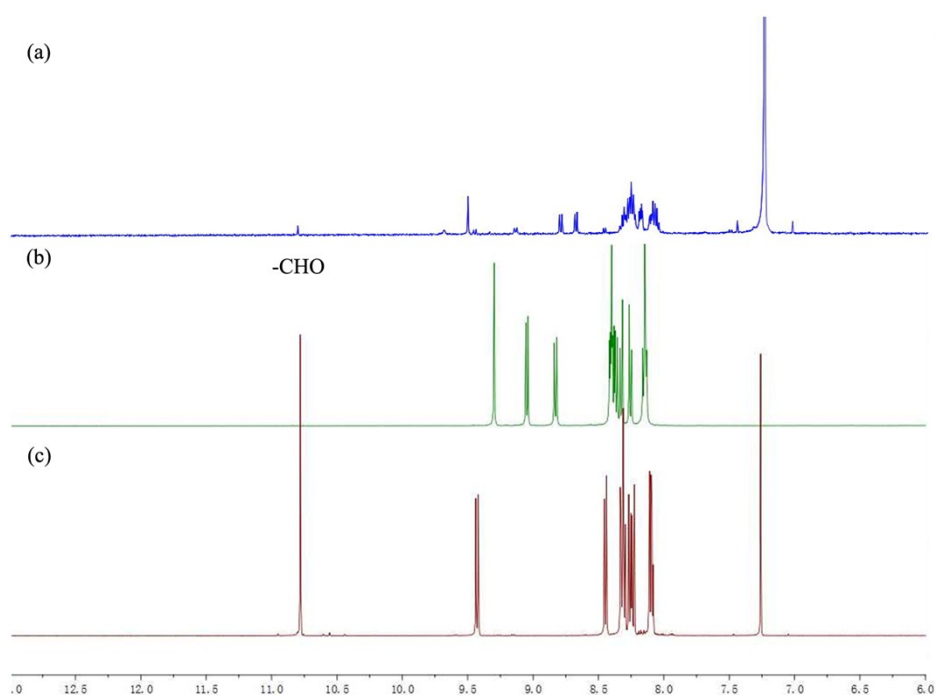

**Fig. S7.** NMR spectra of PYCN in presence of  $\text{ClO}^-$  (a), PYCN (b) and 1-pyrenecarboxaldehyde (c)
